## RESEARCH ARTICLE

# Potential of root acid phosphatase activity to reduce phosphorus fertilization in maize cultivated in Brazil

Lucas Lopes e Silva<sup>1\*</sup>, João Antonio da Costa Andrade<sup>1</sup>, Kátia Luciene Maltoni<sup>2</sup>,  
Luciela Santos Lannes<sup>1</sup>

**1** Department of Biology and Animal Science, São Paulo State University, Ilha Solteira, São Paulo, Brazil,  
**2** Department of Plant Health, Rural Engineering and Soils, São Paulo University, Ilha Solteira, São Paulo,  
Brazil

\* [lucas.e.silva@unesp.br](mailto:lucas.e.silva@unesp.br)

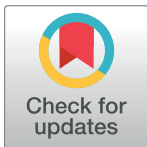

## OPEN ACCESS

**Citation:** Lopes e Silva L, Andrade JAdC, Maltoni KL, Lannes LS (2023) Potential of root acid phosphatase activity to reduce phosphorus fertilization in maize cultivated in Brazil. PLoS ONE 18(10): e0292542. <https://doi.org/10.1371/journal.pone.0292542>

**Editor:** Adalberto Benavides-Mendoza, Universidad Autónoma Agraria Antonio Narro, MEXICO

**Received:** October 2, 2022

**Accepted:** September 24, 2023

**Published:** October 27, 2023

**Copyright:** © 2023 Lopes e Silva et al. This is an open access article distributed under the terms of the [Creative Commons Attribution License](https://creativecommons.org/licenses/by/4.0/), which permits unrestricted use, distribution, and reproduction in any medium, provided the original author and source are credited.

**Data Availability Statement:** All data files are available from the Dryad database (DOI: [10.5061/dryad.ngf1vhj19](https://doi.org/10.5061/dryad.ngf1vhj19)).

**Funding:** This study was financed in part by the Coordenação de Aperfeiçoamento de Pessoal de Nível Superior – Brasil (CAPES) – Finance Code 001 (Scholarship to LLS). The funder had no role in the study design, data collection and analysis, publication decision, or manuscript preparation.

**Competing interests:** The authors have declared that no competing interests exist.

## Abstract

It is urgent to mitigate the environmental impacts resulting from agriculture, especially in highly biodiverse and threatened areas, as the Brazilian Cerrado. We aim to investigate whether root acid phosphatase activity is alternative plant strategies for nutrient acquisition in maize genotypes cultivated under fertilized and unfertilized conditions in Brazil, potentially contributing to reducing the use of phosphate fertilizers needed for production. Three experiments were performed: the first was conducted in a glasshouse, with 17 experimental maize inbred lines and two phosphorus (P) treatments; the second in the field, with three maize inbred lines and two treatments, one without fertilization and another with NPK fertilization; and the third was also carried out in the field, with 13 commercial hybrids, grown either under NK or under NPK treatment. Plant variables were measured and tested for the response to fertilization, differences amongst genotypes and response to root acid phosphatase activity. The activity of root acid phosphatase was modulated by the availability of P and nitrogen (N) in the soil and promoted grain filling of commercial hybrids in soils with low P availability. These results demonstrate that it is possible to select genotypes that are more adapted to low soil P availability aiming at organic production, or to use genotypes that have high phosphatase activity under P fertilization to reduce the amount of added P needed for maize production in Brazil.

## Introduction

Efforts towards sustainable agricultural production have received attention in recent years due to the urgent need to mitigate environmental degradation caused by agricultural practices [1–4]. Phosphorus (P) is limiting to plant growth in several agricultural systems, which is remediated by fertilizer applications, but phosphate fertilization when used in excess is harmful to the environment [5–9]. Reducing the use of phosphate fertilizers by exploiting organic P sources is an excellent alternative and one of the most promising means for more sustainable agricultural production, especially in Cerrado soils deficient in inorganic P but

rich in organic P [10–12]. The Cerrado, as a rich reservoir of genetic resources, has wild plants with several adaptive strategies to overcome low P availability [13, 14], but cultivated plants also present a wide genotypic variation on strategies for P acquisition [15].

Plants can exploit various soil organic fractions through the exudation of acid phosphatases (PME), protons and organic acids, through greater root volume and investment in cluster roots and mycorrhizal association [16, 17]. PMEs are released by plants and microorganisms, having ideal activity in acidic conditions and increasing the general uptake of P by the plant. PME activity is responsible for active or appropriate mobilization of organic sources of P, cleaving phosphate from phosphomonoesters and phosphodiester, increasing the uptake of the plant from P resources not readily available for uptake, making it possible to reduce the use of phosphate fertilizers on maize [18–20]. In fact, a considerable part of the assimilated P is produced from the mineralization of organic P through the PME [12].

Maize has high genetic variability and can be cultivated in different environmental conditions with specific and broad adaptations to the environment [21]. It has high productive potential and high demand for P due to its intense development and short cycle [22]. Studies point out that, amongst a wide range of PMEs codified by plants, purple acid phosphatases (PAPs) play a significant role in P foraging and recycling [23]. In maize, 33 genes related to PAPs were identified, showing that the expression of this character is quantitative and confirming that there are important functional variations within maize germplasm [24]. The authors also reported that the accumulation of the gene *ZmPAP26* was not different under high- and low-P availabilities, differently to 19 other PAP genes that had higher root acid phosphatase (rPME) activity under lower P availability. This suggests that PAP genes in maize have several functions in post-transcriptional regulation and possibly the functional divergence is higher than known so far.

Wang et al. [25] reported that maize had higher biomass and P concentration when grown with alfalfa than in monocultures, both under P fertilization and control conditions, because alfalfa produced more PME and anions in the mixture than in the monoculture, promoting an overall better soil exploitation. Sun et al. [26] studied PME and arbuscular mycorrhizae fungi (AMF) in maize grown alone and with alfalfa and observed that maize PME was higher under lower soil P conditions and in the mixture, contributing to P uptake, upon which AMF had a limited effect. Another recent study showed that soil P, soil PME and maize productivity were not altered when phosphate fertilization was reduced in 20% added along with maize straw in relation to the conventional fertilization regime [20]. There were, therefore, several PME responses of maize to environmental and cultivation conditions even though these works still did not consider the existence of a wide genetic variation in maize for several characters, which is the basis for the development of genotypes well-adapted to varied environments and different cultivation regimes.

Based on the above assumptions, the main hypotheses of this research are that (1) rPME activity differs in various genotypes cultivated in the Cerrado, (2) rPME activity is modulated by inorganic P addition, with higher values found under natural cultivation than under traditional P addition, and (3) maize growth and productivity are affected by rPME. We aim at verifying the performance of various maize genotypes (experimental inbred lines and commercial hybrids) in relation to rPME under different soil inorganic P availabilities (S1 Fig). Specifically, we aim at investigating whether (1) different genotypes grown in the Cerrado have different rPME activities, (2) phenotypic plasticity for rPME in relation to fertilization occurs, (3) rPME affect growth and productivity under natural and P fertilized conditions.

## Materials and methods

### Glasshouse study

A glasshouse study was conducted from August to October 2018 in Ilha Solteira, São Paulo State, Brazil (20°25'04.77"S 51°20'30.65"W, 375 m elevation). We used 3.5 L pots filled with 3.2 kg dry soil of 2 mm-sieved Cerrado soil (dystrophic Red Latosol–Oxisol) [27]. From seeds, seventeen genotypes were cultivated under each of two treatments (control–only distilled water added, or P fertilization– 768 mg sodium phosphate (Na<sub>2</sub>HPO<sub>4</sub>), equivalent to 200 mg P.kg<sup>-1</sup> soil, as suggested by Novais et al. [28]), in three replicates, in a total of 102 pots. These inbred lines were chosen because they are experimental genotypes developed at São Paulo State University (UNESP–Campus of Ilha Solteira) and are potential candidates for a future breeding program (S1 Table).

In the 9-leaf stage of the plants, the pot was removed, the roots collected and washed first with tap water and then with distilled water. We then evaluated rPME activity, plant height, number of leaves, stem diameter, root water content, aerial dry biomass, root dry biomass and total dry biomass. The measurements were performed during this plant stage because it represents the end of the plant vegetative stage and the start of the most P-demanding stage of the crop.

Root PME activity was measured using 100 mg fresh roots in 5 ml p-NPP (*para*-nitrophenylphosphate). Root samples were taken to the laboratory for immediate measurements, and 3–5 analytical replicates were used per plant (p-NPP) bioassay [29]. Plant height and stem diameter were measured with a flexible ruler. Aerial dry biomass, root dry biomass, root plant water content and total dry biomass were measured after drying the material at 60°C for 72 h.

The chemical attributes of the soil used for the experiment are: 11 mg.dm<sup>-3</sup> resin-P; 19 g.dm<sup>-3</sup> organic matter; water-pH 5.0; K, Ca, Mg, H<sup>+</sup>, Al = 1.4; 11.0; 9.0 and 22.0 mmol<sub>c</sub>.dm<sup>-3</sup>, respectively; Cu, Fe, Mn, Zn = 1.6; 16.0; 20.0 and 0.7 mg.dm<sup>-3</sup>, respectively; 0.17 mg.dm<sup>-3</sup> B, CEC = 43.4 0 mmol<sub>c</sub>.dm<sup>-3</sup>, 49% bases saturation and granulometry of 420, 50 and 530 g.kg<sup>-1</sup> of sand, silt and clay respectively. Extractable P was measured colorimetrically after extraction with ion exchange resin and then washed with 0.8 M NH<sub>4</sub>Cl and 0.2 M HCl. N concentration was measured using the micro-Kjeldahl procedure. Extractable sulfur (S) was measured colorimetrically after extraction with activated charcoal and 0.01 M Ca(H<sub>2</sub>PO<sub>4</sub>). Soil pH was measured in a soil–water suspension (10 g dry soil in 50 ml deionized water) using a Metrohm Herisau pH meter with a Mettler Toledo electrode. Soil organic matter content was determined colorimetrically after extraction for 10 min with 0.667 M sodium dichromate and 5 M sulfuric acid. Soil extractable B was measured after extraction of 10 cm<sup>-3</sup> dry soil with 20 ml barium chloride 6 mM solution by heating in a microwave at 490 W for 5 min. The B concentration was measured colorimetrically using the azomethine-H method and adsorption at 420 nm on a spectrophotometer (Varian 50 Probe). Extractable Ca, Cu, Fe, Mg, Mn, K, and Zn concentrations were measured by means of atomic adsorption. Extractable Al was measured after extraction with 1 M KCl and titration with NaOH using the phenolphthalein method. All soil chemical characteristics were determined through standard methods at the UNESP Soil Laboratory according to Raij et al. [30], Lannes et al. [31] and Teixeira et al. [32]. At the end of the experiment, one soil sample per pot was collected for determinations of nutrients following the same methods.

### Field study 1

Field study 1 was performed from November 2018 to January 2019 in Selvíria, in the State of Mato Grosso do Sul, Brazil (20°20'50.65"S 51°24'06.32"W, 344 m elevation), located 11 km on the Northwestern of Glasshouse study area. Soils are classified as dystrophic Red Latosol–

Oxisol [27]. Climate is characterized as Aw [33], tropical wet with a rainy season generally occurring from November to March and a pronounced dry season from April to October.

From seeds, we cultivated four genotypes under two fertilization treatments and three replications, in a total of 24 plants used for analysis. The genotypes were constituted by three inbred lines, L4, L8 and L12 (S1 Table)—which were selected because they had significantly lower rPME in the control than in P fertilized pots in the Glasshouse study, and a flint maize population (Pop), selected for low technology, genetically variable and equilibrated. The treatments used were control—only water added, or NPK fertilization— 20 kg.ha<sup>-1</sup> (N): 51.6 kg.ha<sup>-1</sup> (PO<sub>4</sub>): 33.2 kg.ha<sup>-1</sup> (K). The plants were grown on lines with 3 meters length each with inter-row distance of 0.90 m (S2 Fig). This experiment was not randomized due to the aim of performing the cross-pollination manually, to obtain maize single-cross, where each genotype on its line was parallel with another line of an inbred line of interest for cross-pollination, with all possible combinations being carried out. The flint maize population was sown around the inbred lines and their harvest was random within each soil fertilization treatment (S2 Fig). To prevent water stress, all plots were irrigated two to three times a week according to the normal on-farm practice in this area, i.e., irrigation per demand following the evapotranspiration rate of the area according to our meteorological station (<https://clima.feis.unesp.br/>), which corresponds to a year average of 3 mm per day. In the 10-leaf stage of the plants we measured plant height and rPME using the abovementioned methods after removing parts of the roots using a shovel and washing first with tap water and then with distilled water.

At the end of the experiment, thirty top-20 cm soil samples were collected with a 5 cm diameter auger and combined in a composite sample. Samples were air dried, sieved and sent to the UNESP Soil Laboratory for determination of chemical attributes as previously described.

## Field study 2

A second field study was conducted from April to September 2019 in an area located close to where Field study 1 took place. We used 13 commercial hybrids (S2 Table), widely used in the region [34–44], with cycle is semi-early, early or super-early, single-cross and double-cross. In three randomized blocks and two treatments: Control—NK addition (20 kg.ha<sup>-1</sup> (N): 0 (PO<sub>4</sub>): 33.2 kg.ha<sup>-1</sup> (K)), or NPK fertilization (20 kg.ha<sup>-1</sup> (N): 51.6 kg.ha<sup>-1</sup> (PO<sub>4</sub>): 33.2 kg.ha<sup>-1</sup> (K)). The plants were grown on 6 lines with 5 meters length each with inter-row distance of 0.45 m, in a total density equivalent to 60,000 plants per hectare (S3 Fig). To prevent water stress, all plots were irrigated two to three times a week according to the normal on-farm practice in this area. In the 10-leaf stage, using one random plant from each block (total of 78 plants) was used for measured rPME, number of leaves and root plant water content, and at the beginning of the reproductive stage, the plant height and ear height were measured using five random plants from each block. Ear height refers to height of insertion of the first ear and plant height is the height of the last fully open leaf. For the destructive methods, the whole field plant was gently removed from the soil using a shovel, the roots were washed first with tap water and then with distilled water. After harvest, we measured the weight of 100 randomly selected grains because this variable is less susceptible than grain weight per plant to other influences of P deprivation as pollination and diseases.

At the end of the experiment, thirty top-20 cm soil samples were collected with a 5 cm diameter auger and combined in a composite sample. Samples were air dried, sieved and sent to the UNESP Soil Laboratory under the current methods mentioned in the previous sections.

## Data analyses

The effect of fertilization upon measured variables was analysed through Student t tests and the differences amongst genotypes were assessed through ANOVA followed by Tukey test using IBM SPSS Statistics 20. Cohen's d effect sizes [45] were calculated as standardized differences between means of total biomass, aerial biomass, root biomass, stem biomass, number of leaves, height and root phosphatase activity between P fertilized and control plots. Linear regression analyses were employed to assess the effects of rPME on growth and productivity parameters. Data were log transformed when necessary to reach normal distribution and homoscedasticity.

## Results

### Glasshouse study–Inbred lines in mesocosms

Fertilized pots had significantly higher available P concentration than unfertilized pots (respectively  $71.3 \pm 32.5$  and  $11.7 \pm 0.58$  mg.dm<sup>-3</sup>,  $t = 10.10$ ,  $P = 0.034$ , more about soil characteristics in S3 Table), confirming that the fertilization treatment was effective. Phosphorus fertilization did not affect other soil variables, with exception to iron, whose concentrations also increased in the soil under P fertilization (Fertilized:  $34.0 \pm 5.6$  and Control:  $21.3 \pm 2.3$  mg.dm<sup>-3</sup>,  $t = 13.2$ ,  $P = 0.022$ ).

Root PME activity significantly decreased under P fertilization when all inbred lines were analysed together (Fig 1). Oppositely, P fertilization had a positive influence of stem diameter and aerial dry biomass. Plant height, number of leaves, total and root dry biomass were not affected by P addition (Fig 1).

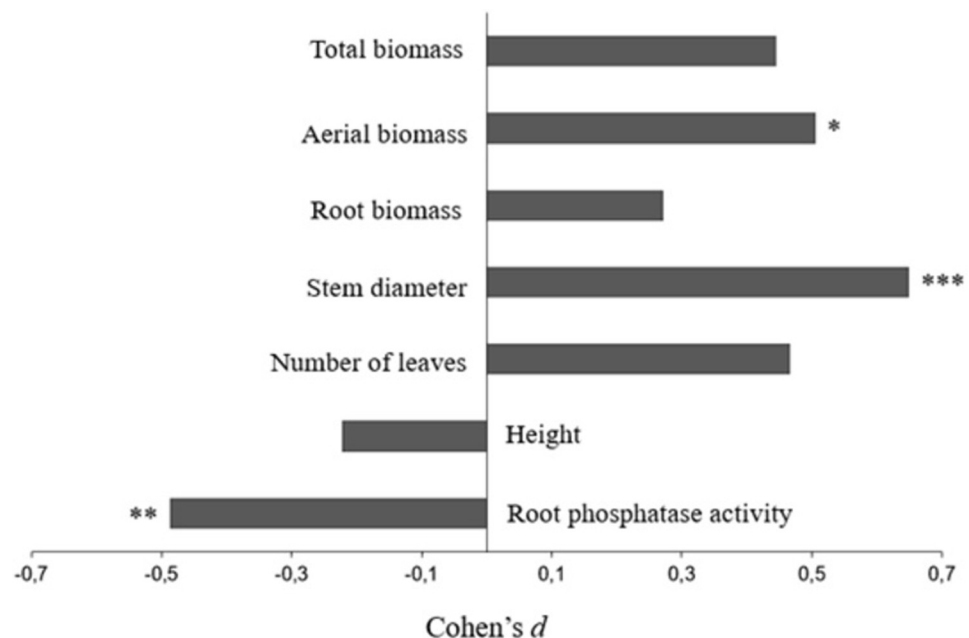

**Fig 1. The effect sizes of P fertilization on measured variables in 17 inbred lines from the glasshouse study.** Effect sizes of P fertilization (200 mg.P.kg<sup>-1</sup> soil) on measured variables in the 9-leaf stage of maize (*Zea mays*). Positive values show that concentrations in P fertilized plots were higher than in the Control plots. Asterisks indicate significant differences (Student's t test, \*  $P < 0.05$ , \*\*  $P < 0.01$ , \*\*\*  $P < 0.001$ ) between P fertilized and Control plots. For full statistical results, see S4 Table.

<https://doi.org/10.1371/journal.pone.0292542.g001>

Six studied inbred lines (L4, L8, L9, L10, L12 e L14) had higher rPME activity in the control than in the fertilized pots, whereas the other eleven inbred lines (L1, L2, L3, L5, L6, L7, L11, L13, L15, L16 e L17) were not affected by P fertilization (Table 1). Although rPME generally decreased under P fertilization (Fig 1 and Table 1), the inbred lines showed highest differences amongst themselves under P fertilization, as observed in L3 ( $314 \pm 124 \mu\text{mol pNPP g-root}^{-1} \cdot \text{h}^{-1}$ ) and L4 ( $303 \pm 34 \mu\text{mol pNPP g-root}^{-1} \cdot \text{h}^{-1}$ ), which were significantly lower than L1 ( $779 \pm 462 \mu\text{mol pNPP g-root}^{-1} \cdot \text{h}^{-1}$ ), L9 ( $774 \pm 9 \mu\text{mol pNPP g-root}^{-1} \cdot \text{h}^{-1}$ ) and L11 ( $772 \pm 305 \mu\text{mol pNPP g-root}^{-1} \cdot \text{h}^{-1}$ ) (Table 1).

### Field study 1 –Inbred lines in the field

The overall average rPME of the inbred lines cultivated in the field was higher in the controls than under NPK fertilization, but no inbred lines individually have shown such response (Table 1). Root PME activity was generally higher in the field than in the glasshouse study (Fig 2).

### Field study 2 –Commercial hybrids in the field

There was generally no effect of fertilization on rPME for the studied hybrids, with exception to hybrid 11, which had higher rPME in the fertilized than in control plants; no differences in rPME were observed amongst the hybrids (Table 2).

**Table 1. The P fertilization effect on rPME in 17 inbred lines and in the Flint maize population (*Zea mays*) in the glasshouse study and in the field study 1.**

| Inbred lines     | Glasshouse study |   |                 |     |       | Field study 1 |                   |           |
|------------------|------------------|---|-----------------|-----|-------|---------------|-------------------|-----------|
|                  | Control          |   | P Fertilization |     | Sig   | Control       | NPK Fertilization | Sig       |
| L1               | 552 (163)        | a | 779 (462)       | bc  | 0.518 | .             | .                 | .         |
| L2               | 526 (108)        | a | 391 (120)       | abc | 0.200 | .             | .                 | .         |
| L3               | 448 (112)        | a | 314 (124)       | a   | 0.248 | .             | .                 | .         |
| L4               | 494 (109)        | a | 303 (34)        | a   | 0.030 | 1754 (368)    | 1386 (359)        | 0.148     |
| L5               | 504 (87)         | a | 452 (129)       | abc | 0.555 | .             | .                 | .         |
| L6               | 531 (132)        | a | 649 (233)       | abc | 0.494 | .             | .                 | .         |
| L7               | 491 (51)         | a | 421 (153)       | abc | 0.404 | .             | .                 | .         |
| L8               | 691 (114)        | a | 392 (39)        | abc | 0.007 | 1173 (260)    | 1385 (916)        | 0.720     |
| L9               | 933 (45)         | a | 774 (9)         | c   | 0.003 | .             | .                 | .         |
| L10              | 712 (12)         | a | 506 (52)        | abc | 0.005 | .             | .                 | .         |
| L11              | 861 (747)        | a | 772 (305)       | bc  | 0.873 | .             | .                 | .         |
| L12              | 712 (129)        | a | 436 (96)        | abc | 0.044 | 2649 (1351)   | 1351 (208)        | 0.175     |
| L13              | 469 (26)         | a | 432 (95)        | abc | 0.510 | .             | .                 | .         |
| L14              | 617 (109)        | a | 356 (40)        | ab  | 0.010 | .             | .                 | .         |
| L15              | 637 (220)        | a | 527 (17)        | abc | 0.461 | .             | .                 | .         |
| L16              | 601 (139)        | a | 607 (138)       | abc | 0.973 | .             | .                 | .         |
| L17              | 594 (233)        | a | 478 (67)        | abc | 0.595 | .             | .                 | .         |
| Flint population | .                | . | .               | .   | .     | 1994 (536)    | 1637 (652)        | 0.198     |
| Total            | 610 (224)        | . | 505 (207)       | .   | 0.003 | 1913 (720)    | 1500 (569)        | 0.046     |
| P and F (ANOVA)  | P = 0.079        |   | P < 0.001       |     |       | P = 0.069     |                   | P = 0.801 |
|                  | F = 1.790        |   | F = 4.051       |     |       | F = 2.831     |                   | F = 0.333 |

Mean values, standard deviations (in parentheses) and significance values of the P fertilization effect ( $200 \text{ mg P kg}^{-1} \text{ soil}$ ) on rPME ( $\mu\text{mol pNPP g-root}^{-1} \cdot \text{h}^{-1}$ ) were tested by means of Student t tests and the differences amongst the inbred lines were tested through ANOVA followed by Tukey tests. Different letters indicate significant differences amongst the inbred lines within treatments. ( $P < 0.05$ ),  $N = 3$ .

<https://doi.org/10.1371/journal.pone.0292542.t001>

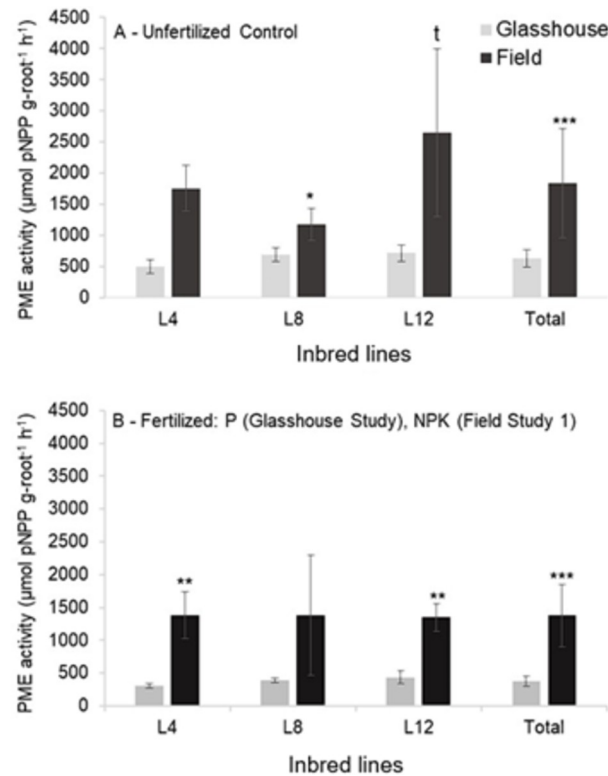

**Fig 2. Root acid phosphatase activity of three individual inbred lines L4, L8 and L12, analysed together in the glasshouse study and in the field study 1 in the unfertilized controls and in the fertilized treatments.** Means, standard deviations and levels of significance resulting from Student t tests are shown.  $t$   $0.10 > P > 0.05$ , \*  $P < 0.05$ , \*\*  $P < 0.01$ , \*\*\*  $P < 0.001$ .

<https://doi.org/10.1371/journal.pone.0292542.g002>

The hybrids 1 and 9 had higher weight of 100 grains in the fertilized than in the control plants (Table 2). For plant height, the hybrids 1, 2, 3, 8, 9, 12 and the general mean were higher in the control than in fertilized plants. The ear height of hybrid 2 was higher in the control, and the opposite was observed for the hybrids 4 and 10 (S5 Table). The weight of 100 grains and the ear height were different amongst the hybrids in both treatments, and plant height only differed in the control plots (Table 2 and S5 Table).

Root PME activity positively influenced the weight of 100 grains of the hybrids in the control plots (Fig 3), but it did not influence other variables (S6 Table).

### Soil characteristics

Soil P concentrations were not significantly different amongst the three experiments (Table 3). Nitrogen, copper and manganese concentrations were different in all experiments. Organic matter and potassium concentrations were higher in the field studies than in the glasshouse study, and the opposite was observed for pH. Calcium and magnesium concentrations were higher in the Field study 2 than in the other experiments, and zinc concentration was lower in the Glasshouse study than in the Field study 2 (Table 3).

### Discussion

It is indisputable that P inputs boost maize metabolism [46], which is corroborated by the higher biomass and stem diameter of the plants under P fertilization in this study. Under

**Table 2. The effects of NK addition or NPK fertilization on rPME and weight of 100 grains of 13 commercial hybrids of maize cultivated in the field study 2.**

| Hybrid    | Root PME activity |              | Weight of 100 grains |                 |
|-----------|-------------------|--------------|----------------------|-----------------|
|           | Control           | P fertilized | Control              | P fertilized    |
| H1        | 1012 (341)        | 885 (138)    | 35.7 (2.8) bc        | 40.8 (1.1)* c   |
| H2        | 1168 (430)        | 1356 (548)   | 35.4 (0.6) bc        | 36.3 (2.0) abc  |
| H3        | 835 (194)         | 641 (77)     | 37.9 (5.9) c         | 40.7 (1.4) c    |
| H4        | 840 (435)         | 661 (217)    | 31.4 (3.4) abc       | 30.9 (2.2) ab   |
| H5        | 1067 (244)        | 929 (374)    | 35.2 (7.2) bc        | 37.4 (1.6) bc   |
| H6        | 799 (310)         | 885 (60)     | 31.9 (0.3) abc       | 30.5 (6.6) ab   |
| H7        | 1011 (371)        | 842 (69)     | 34.1 (2.8) abc       | 38.0 (4.0) bc   |
| H8        | 774 (290)         | 1199 (429)   | 26.9 (1.8) ab        | 33.3 (4.4) abc  |
| H9        | 782 (620)         | 1090 (542)   | 28.6 (1.3) abc       | 32.2 (1.9)* abc |
| H10       | 575 (85)          | 715 (213)    | 30.4 (2.1) abc       | 29.0 (0.4) ab   |
| H11       | 727 (90)          | 947 (66)*    | 24.9 (1.8) a         | 27.3 (3.3) a    |
| H12       | 627 (284)         | 1150 (368)   | 30.6 (1.1) abc       | 29.8 (1.4) ab   |
| H13       | 956 (190)         | 1150 (87)    | 29.5 (2.2) abc       | 31.8 (4.8) abc  |
| Total     | 860 (313)         | 930 (330)    | 31.7 (4.5)           | 33.7 (5.1)      |
| P and     | P = 0.756         | P = 0.157    | P < 0.001            | P < 0.001       |
| F (ANOVA) | F = 0.679         | F = 1.588    | F = 4.19             | F = 5.87        |

Mean values and standard deviations of rPME ( $\mu\text{mol pNPP g-root}^{-1}\text{h}^{-1}$ ) and weight of 100 grains (g) under two treatments: Control–NK addition ( $20 \text{ kg}\cdot\text{ha}^{-1}$  (N): 0 ( $\text{PO}_4$ ):  $33.2 \text{ kg}\cdot\text{ha}^{-1}$  (K)), or NPK fertilization ( $20 \text{ kg}\cdot\text{ha}^{-1}$  (N):  $51.6 \text{ kg}\cdot\text{ha}^{-1}$  ( $\text{PO}_4$ ):  $33.2 \text{ kg}\cdot\text{ha}^{-1}$  (K)). The effects of fertilization upon measured variables were tested by means of Student t tests ( $N = 3$ ) and indicated by asterisks when significant (\*  $P < 0.05$ , \*\*  $P < 0.01$ ). Differences among hybrids were analysed through ANOVA followed by Tukey test ( $N = 3$ ) and different letters indicate differences within treatments ( $P < 0.05$ ).

<https://doi.org/10.1371/journal.pone.0292542.t002>

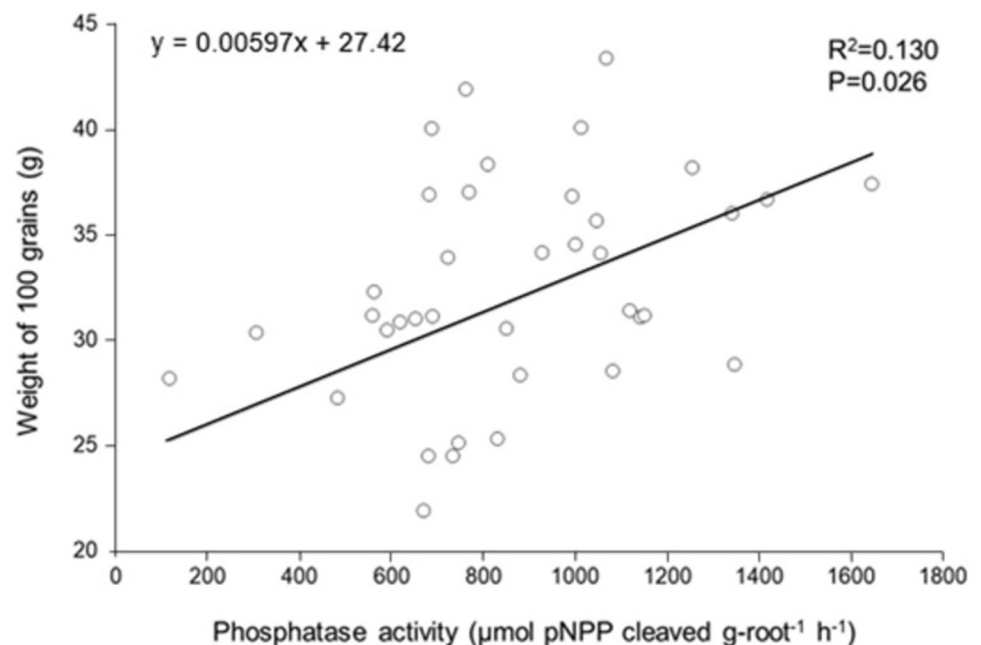

**Fig 3. Effect of rPME on weight of 100 grains in P-unfertilized control plots in 13 commercial hybrids of maize (*Zea mays*) cultivated in the field ( $N = 39$ ).**

<https://doi.org/10.1371/journal.pone.0292542.g003>



**Table 3. Soil characteristics in the three experiments performed.**

|                                           | Glasshouse study | Field study 1  | Field study 2 | F      | P      |
|-------------------------------------------|------------------|----------------|---------------|--------|--------|
| N (g.kg <sup>-1</sup> )                   | 0.93 (0.07) a    | 1.39 (0.09) b  | 1.70 (0.08) c | 117.55 | <0.001 |
| P—resin (mg.dm <sup>-3</sup> )            | 41.5 (38.6)      | 40.0 (13.5)    | 36.3 (7.3)    | 0.03   | 0.970  |
| MO (g.dm <sup>-3</sup> )                  | 19.3 (1.03) a    | 24.7 (1.15) b  | 26.3 (2.08) b | 31.93  | <0.001 |
| pH (CaCl <sub>2</sub> )                   | 5.03 (0.1) b     | 4.63 (0.15) a  | 4.73 (0.12) a | 13.59  | <0.001 |
| K (mmol <sub>c</sub> .dm <sup>-3</sup> )  | 0.78 (0.08) a    | 5.06 (0.67) b  | 4.13 (0.71) b | 105.39 | <0.001 |
| Ca (mmol <sub>c</sub> .dm <sup>-3</sup> ) | 12.3 (0.82) a    | 10.0 (1.73) a  | 16.3 (1.15) b | 23.34  | <0.001 |
| Mg (mmol <sub>c</sub> .dm <sup>-3</sup> ) | 10.0 (0.63) a    | 9.7 (0.58) a   | 12.7 (1.53) b | 10.79  | <0.001 |
| Al (mmol <sub>c</sub> .dm <sup>-3</sup> ) | 1.67 (0.82)      | 3.33 (1.53)    | 2.33 (0.58)   | 2.90   | 0.110  |
| B (mg.dm <sup>-3</sup> )                  | 0.15 (0.05)      | 0.19 (0.03)    | 0.17 (0.04)   | 0.80   | 0.480  |
| Cu (mg.dm <sup>-3</sup> )                 | 20.8 (1.3) a     | 52.7 (1.5) b   | 62.7 (2.5) c  | 725.75 | <0.001 |
| Fe (mg.dm <sup>-3</sup> )                 | 27.7 (7.9)       | 22.3 (1.1)     | 26.0 (0)      | 0.81   | 0.470  |
| Mn (mg.dm <sup>-3</sup> )                 | 24.4 (1.5) a     | 29.8 (0.5) b   | 41.6 (0.4) c  | 221.11 | <0.001 |
| Zn (mg.dm <sup>-3</sup> )                 | 0.72 (0.04) a    | 3.77 (1.69) ab | 6.77 (5.58) b | 5.01   | 0.030  |

Mean values, standard deviations (in parentheses) and P values. Differences amongst the experiments were tested by means of ANOVA followed by Tukey test (N = 3). Different letters indicate significant differences in the concentration of the given parameter (P<0.05). Soil methods are described in Section 2.1.

<https://doi.org/10.1371/journal.pone.0292542.t003>

natural non-fertilized conditions, however, maize uses other strategies to overcome P limitation, as indicated by the higher root phosphatase activity in the control in related to P fertilized conditions.

Higher P availability inhibits rPME activity [47] because the plant does not need to produce the enzyme when its product is abundant, which explains the lowest activities in P fertilized plants in both studies using inbred lines. For maize (*Zea mays*), the effect of P addition upon metabolism varies according to the genotype and to its susceptibility to soil P deficiency [48]. The genetic regulation system normally acts to avoid the unnecessary expression of genes in specific organs and in specific time periods. Any deviation from this pattern indicates variation in the regulatory genes system, as observed in hybrid 11, which had higher rPME under P fertilization, similarly to the genotype studied by Wei et al. [20] that detected higher PME under NPK plus maize straw treatment in comparison to unfertilized control plants. Most inbred lines investigated in this study did not respond significantly to P addition, showing that for these experimental genotypes, genes acting on the regulation of rPME are generally not sensitive to soil P availability.

Inbred lines 4, 8 and 12 showed different responses to P fertilization when cultivated in the glasshouse and in the field. While their rPME values were higher in the control than in the fertilized pots in the glasshouse, such differences were not detected in the field. Since higher activities were always detected in the field than in the glasshouse in both treatments, we speculate that the higher soil N availability in the field when compared to the glasshouse may have stimulated the activity of the enzyme since it is N-rich and therefore highly controlled by N [47, 49, 50], especially when soil P contents are low [51]. Another possible explanation for the higher rPME observed in the field resides in the presence of neighbouring plants in the field, whose root contact stimulates rPME, as shown by Lannes et al. [52] for Cerrado wild plants and more recently in a meta-analysis by Chen et al. [53].

When grown alone in the glasshouse pots, the inbred lines presented reduced rPME in relation to the field presumably because they tend to invest more N in plant development and therefore have less N to employ in other strategies, as rPME. In the glasshouse control pots, however, the inbred lines invested more in rPME due to the lower soil P availabilities, at the

cost of lower growth, which suggests a tradeoff between high rPME and N economy. These observations point to a low availability of N in the soil as a limiting factor for plant growth when it invests in rPME and does not have sufficient N for growth [49].

The positive effect that rPME exerts on the weight of 100 grains in the P unfertilized hybrids demonstrates, for the first time, the importance of the activity of this enzyme for productivity enhancement in maize under low P conditions and reinforces the need to consider this variable for P acquisition in natural, non-P fertilized agricultural systems. Since it not common that plant breeding companies test their hybrids under natural unfertilized conditions and due to the high number of hybrids currently available in the market, it is possible that some of these genotypes already have high N-use efficiency and high rPME that could make them suitable for more sustainable systems without problems associated to productivity loss.

The positive correlation found between rPME activity and grain filling found in this study partly explains why Wei et al. [20] did not find maize productivity losses or soil phosphatase activity gains after reducing P-NPK fertilization in 20% (similarly to our 12 hybrids that did not respond to P addition). This was possibly because of the stoichiometric regulation of the balance between N and P since it is not convenient for the plant to invest in acid phosphatase activity (and therefore invest nitrogen) under higher phosphate availability. On another hand, to invest in phosphatase activity is desirable to keep a balanced internal N and P plant stoichiometry and thus a better plant development and higher productivity under conditions of low soil phosphate availability, contributing to avoid a fall in productivity and enabling the reduction of the use of phosphate fertilizers.

Lu et al. [54] promoted the superexpression of the genes *OsPAP10a* and *OsPAP10c* in genetically modified rice and Wang et al. [55] inserted the *Arabidopsis thaliana* gene *AtPAP15* in genetically modified soybeans aiming at increasing rPME. Although they observed a better efficiency on organic-P use in soils with low inorganic P availability, the yield was still lower in comparison to the unmodified genotypes. These experiments did not consider N as an important regulation factor for rPME. We reinforce that high availability or use efficiency of N is necessary to translate high rPME to productivity gain, given that this enzyme is highly N demanding [47, 49]. Nitrogen availability and rPME acting to release P seem to colimit grain filling and plant development because as rPME increases, more internal N is used, reducing the availability of N for plant metabolism and thus affecting plant growth [51]. Therefore, we suggest that for optimum productivity and/or growth increase in maize, it is necessary that N availability and rPME increase concomitantly, independently of the soil type. The application of this practice could support a more sustainable maize production system, which could be even more effective if genotypes with N-fixing capacity are used, as in association with diazotrophic bacteria, mainly *Azospirillum brasilense* that can provide from 29% to 82% of the overall N absorbed by maize [56]. Conventional plant breeding allows the indirect selection of genes that are unknown to influence phosphatase, as for example nitrogen-related genes that might be indirectly selected in this process.

The differences in rPME activity found amongst the inbred lines show that genetic variability for this character exists (Table 1), agreeing with results shown by Machado and Furlani [57], which evaluated six genotypes (three common and three improved varieties) and identified one genotype with significantly a lower PME activity in comparison to the others. The occurrence of genetic variability was also detected by Chen et al. [58], who estimated the broad-sense heritability as 52.7% for rPME and as 90.9% for P absorption efficiency in maize. Chen et al. [58] also reported that the two tested parentals differed significantly for rPME, with the P-deficiency tolerant genotype having higher values than the P-deficiency susceptible genotype.

However, no differences were detected in rPME of the commercial hybrids investigated, but the comparison of their rPME under fertilization to the field fertilized inbred lines ( $1376 \pm 478$  and  $930 \pm 330 \mu\text{mol pNPP g-root}^{-1} \cdot \text{h}^{-1}$  respectively,  $F = 13.06$ ,  $P = 0.001$ ) shows that the indirect selection resulting from genetic improvement tends to select low rPME genotypes, which is corroborated by the high phenotypic and genetic potential of the inbred lines. This makes possible the generation of single-cross with high variability for this character, considering that PME is a quantitative character with 33 genes involved on its control, whose functions are still not well understood [24].

With this work, we show that there is possibility of success on the selection of genotypes of maize that are naturally adapted to low soil P availability, and concomitantly of genotypes that have high rPME under P fertilization to reduce the amount of inorganic P needed to grow maize in the Cerrado. These will help farmers who base their maize production on high technology and will also benefit conventional farmers by reducing the amount of P needed for production. Future research should specifically investigate the relationship between N availability and rPME in maize, by targeting on tests of hybrids without P addition. Considering that the current increases in carbon and N due to human activities are not followed by increases in P availability [59] and that such unbalanced stoichiometries can cause losses for agriculture, we recommend the generation of genetic variability for rPME together with improving the N absorption and use efficiency in maize aiming at productivity increase in more sustainable production systems.

## Conclusions

Previous works on the topic have investigated the relationships between acid phosphatase activity and phosphorus deficiency in maize, showing that phosphatase activity increased under extremely low soil phosphorus availability, but also generating very low yields.

This study found phenotypic variability for root acid phosphatase activity in maize cultivated in Brazil, being important for plant development and cultivation in the diverse Brazilian soils. We also observed a possible modulation of phosphatase activity by nitrogen. Due to its high genetic potential, and for positively influencing grain productivity in low P soils, the insertion of root acid phosphatase activity in programs of maize genetic improvement aiming at a higher P efficiency is promising. The development of genotypes adapted to more sustainable production systems in P impoverished areas in Brazil could reduce P fertilizer use, mitigating eutrophication in Cerrado natural adjacent ecosystems.

## Supporting information

**S1 Fig. Maize plants growing in the field and in the glasshouse photos.** Maize plants growing in the field (a,c) and in the glasshouse (b) for assessment of the effects of genotype on phosphatase activity (d,e) and of this upon productivity (f) in Brazil. Photo credits: a, b, c—Luciola S Lannes; d, e—Lucas Lopes e Silva; f—João Antonio da Costa Andrade. (DOCX)

**S2 Fig. Schematic diagram showing the field design of field study 1.** The three genotypes that had significantly lower rPME in the control than in P fertilized pots in the Glasshouse study (L4, L8 and L12, S1 Table), and a border flint maize population, selected for low technology, genetically variable and equilibrated were grown under Control (only water added), or NPK fertilization ( $20 \text{ kg} \cdot \text{ha}^{-1}$  (N):  $51.6 \text{ kg} \cdot \text{ha}^{-1}$  ( $\text{PO}_4$ ):  $33.2 \text{ kg} \cdot \text{ha}^{-1}$  (K)). The plants were grown on lines with 3 meters length each with inter-row distance of 0.90 m. This experiment was not randomized due to the aim of performing the cross-pollination manually, to obtain single-

cross maize hybrids, where each genotype on its line was parallel with another line of an inbred lines of interest for cross-pollination. With all possible combinations being carried out, the population was planted around the inbred lines and their collection was random within each soil fertilization treatment. Single asterisks indicate where samples were collected for analyses. (DOCX)

**S3 Fig.** Schematic diagram (left) and identification of the hybrids for each block (right) showing the field design of Field study 2. We used 13 commercial hybrids (S2 Table), in three randomized blocks (red and black numbers in the left scheme were used to delimitate block, 1, 2 and 3). Two treatments were applied: Control–NK addition (20 kg.ha<sup>-1</sup> (N): 0 (PO<sub>4</sub>): 33.2 kg.ha<sup>-1</sup> (K)), or NPK fertilization (20 kg.ha<sup>-1</sup> (N): 51.6 kg.ha<sup>-1</sup> (PO<sub>4</sub>): 33.2 kg.ha<sup>-1</sup> (K)). The plants were grown on 6 lines with 5 meters length each with inter-row distance of 0.45 m, in a total density equivalent to 60,000 plants per hectare. Root phosphatase activity was measured in one random plant from each block (total of 78 plants). Number of leaves, root plant water content, plant height and ear height were measured in five random plants from each block (total of 390 plants). Per block 100 grains were randomly selected for dry weight measurement. (DOCX)

**S1 Table. Identification of the inbred lines of maize (*Zea mays*) studied in the glasshouse study and in field study 1.** \*—genotypes used both in the Glasshouse and Field study 1. (DOCX)

**S2 Table. Identification and characterization of the 13 commercial hybrids of maize (*Zea mays*) used in field study 2.** (DOCX)

**S3 Table. Soil characteristics in the glasshouse study.** Mean values, standard deviations (in parentheses) and t tests results for soil characteristics in control and P fertilized pots (200 mg.P.kg<sup>-1</sup> soil). (DOCX)

**S4 Table. Mean values, standard deviations (in parentheses), and P values associated to t tests checking the effect of P fertilization (200 mg.P.kg<sup>-1</sup> soil) on measured variables in 17 inbred lines in the 9-leaf stage of maize (*Zea mays*) from the glasshouse study.** N = 3. (DOCX)

**S5 Table. Mean values and standard deviations of plant height (cm) and ear height (cm) of 13 commercial hybrids of maize cultivated in the field study 2 under two treatments.** Control–NK addition (20 kg.ha<sup>-1</sup> (N): 0 (PO<sub>4</sub>): 33.2 kg.ha<sup>-1</sup> (K)), or NPK fertilization (20 kg.ha<sup>-1</sup> (N): 51.6 kg.ha<sup>-1</sup> (PO<sub>4</sub>): 33.2 kg.ha<sup>-1</sup> (K)). The effects of fertilization upon measured variables were tested by means of Student t tests (N = 3) and indicated by asterisks when significant (\* P<0.05, \*\* P<0.01). Differences among hybrids were analysed through ANOVA followed by Tukey test (N = 3) and are indicated by different letters within the treatment (P<0.05). (DOCX)

**S6 Table. Values of F, significance and coefficient of determination resulting from single linear regressions between productivity and growth variables and rPME in the commercial hybrids (field study 2).** Data are show for control, P fertilized and all data analysed together. (DOCX)

## Acknowledgments

The authors thank the staff from the UNESP Farm of Ilha Solteira (FEPE) for helping to cultivate the plants in the field, and the colleagues from the Plant Ecology Lab for giving support for sample collections and analyses.

## Author Contributions

**Conceptualization:** Lucas Lopes e Silva, João Antonio da Costa Andrade, Lucíola Santos Lannes.

**Data curation:** Lucas Lopes e Silva, Lucíola Santos Lannes.

**Formal analysis:** Lucas Lopes e Silva, João Antonio da Costa Andrade, Lucíola Santos Lannes.

**Funding acquisition:** Lucíola Santos Lannes.

**Investigation:** Lucas Lopes e Silva, João Antonio da Costa Andrade, Lucíola Santos Lannes.

**Methodology:** Lucas Lopes e Silva, João Antonio da Costa Andrade, Kátia Luciene Maltoni, Lucíola Santos Lannes.

**Project administration:** Lucíola Santos Lannes.

**Resources:** Lucas Lopes e Silva, João Antonio da Costa Andrade, Lucíola Santos Lannes.

**Software:** Lucas Lopes e Silva, João Antonio da Costa Andrade, Lucíola Santos Lannes.

**Supervision:** João Antonio da Costa Andrade, Lucíola Santos Lannes.

**Validation:** Lucas Lopes e Silva, João Antonio da Costa Andrade, Lucíola Santos Lannes.

**Visualization:** Lucas Lopes e Silva, João Antonio da Costa Andrade, Lucíola Santos Lannes.

**Writing – original draft:** Lucas Lopes e Silva, Lucíola Santos Lannes.

**Writing – review & editing:** Lucas Lopes e Silva, João Antonio da Costa Andrade, Kátia Luciene Maltoni, Lucíola Santos Lannes.

## References

1. Nations United. Transforming our world: The 2030 agenda for sustainable development. 2015. Available from: <https://sustainabledevelopment.un.org/post2015/transformingourworld>
2. Mockshell J, Kamanda J. Beyond the agroecological and sustainable agricultural intensification debate: Is blended sustainability the way forward?. *International Journal of Agricultural Sustainability*. 2018; 16(2): 127–149. <https://doi.org/10.1080/14735903.2018.1448047>
3. Antle JM, Ray S. Sustainable agricultural development. *Palgrave Studies in Agricultural Economics and Food Policy*. 1st ed. Palgrave Macmillan Cham. 2020. <https://doi.org/10.1007/978-3-030-34599-0>
4. Piñeiro V, Arias J, Dürr J, Elverdin P, Ibáñez AM, Kinengyere A, et al. Scoping review on incentives for adoption of sustainable agricultural practices and their outcomes. *Nature Sustainable*. 2020; 3: 809–820. <https://doi.org/10.1038/s41893-020-00617-y>
5. Hou E, Luo Y, Kuang Y, Chen C, Lu X, Jiang L, et al. Global meta-analysis shows pervasive phosphorus limitation of aboveground plant production in natural terrestrial ecosystems. *Nature Communications*. 2020; 11(1). <https://doi.org/10.1038/s41467-020-14492-w> PMID: 32005808
6. Wassen MJ, Olde Venterink H, Lapshina ED, Tanneberger F. Endangered plants persist under phosphorus limitation. *Nature*. 2005; 437: 547–550. <https://doi.org/10.1038/nature03950> PMID: 16177790
7. Lannes LS, Bustamante MMC, Edwards PJ, Olde Venterink H. Native and alien herbaceous plants in the Brazilian Cerrado are (co-)limited by different nutrients. *Plant and Soil*. 2016; 400(1): 231–243. <http://doi.org/10.1007/s11104-015-2725-9>
8. Bustamante MMC, de Britto DQ, Kozovits AR, Luedemann G, de Mello TRB, Pinto AS, et al. Effects of nutrient additions on plant biomass and diversity of the herbaceous-subshrub layer of a Brazilian savanna (Cerrado). *Plant Ecology*. 2012; 213: 795–808. <http://doi.org/10.1007/s11258-012-0042-4>

9. Khan A, Lu G, Ayaz M, Zhang H, Wang R, Lu F, et al. Phosphorus efficiency, soil phosphorus dynamics and critical phosphorus level under long-term fertilization for single and double cropping systems. *Agriculture, Ecosystems & Environment*. 2018; 256(15): 1–11. <https://doi.org/10.1016/j.agee.2018.01.006>
10. Goedert WJ. Management of the Cerrado soils of Brazil: a review. *Journal of Soil Science*. 1983; 34(3): 405–428. <https://doi.org/10.1111/j.1365-2389.1983.tb01045.x>
11. Chapuis-Lardy L, Brossard M, Quiquampoix H. Assessing organic phosphorus status of Cerrado oxisols (Brazil) using  $^{31}\text{P}$ -NMR spectroscopy and phosphomonoesterase activity measurement. *Canadian Journal of Soil Science*. 2001; 81(5): 591–601. <https://doi.org/10.4141/S00-079>
12. Adetunji AT, Lewu FB, Mulidzi R, Ncube B. The biological activities of  $\beta$ -glucosidase, phosphatase and urease as soil quality indicators: a review. *Journal of Soil Science and Plant Nutrition*. 2017; 17(3): 794–807. <http://doi.org/10.4067/s0718-95162017000300018>
13. Lannes LS. Effects of soil nutrients upon native and alien invasive plants in the Brazilian Cerrado. PhD Thesis, ETH Zürich. 2012. Available from: <https://doi.org/10.3929/ethz-a-007339355>
14. Lambers H, Costa PB, Oliveira RS, Silveira FA. Towards more sustainable cropping systems: Lessons from native Cerrado species. *Theoretical and Experimental Plant Physiology*. 2020; 32: 175–194. <http://doi.org/10.1007/s40626-020-00180-z>
15. Cong W, Suriyagoda LDB, Lambers H. Tightening the phosphorus cycle through phosphorus-efficient crop genotypes. *Trends in Plant Science*. 2020; 25(10): 967–975. <https://doi.org/10.1016/j.tplants.2020.04.013> PMID: 32414603
16. Lambers H, Shane MW, Cramer MD, Pearse SJ, Veneklaas EJ. Root structure and functioning for efficient acquisition of phosphorus: Matching morphological and physiological traits. *Annals of Botany*. 2006; 98(4): 693–713. <https://doi.org/10.1093/aob/mcl114> PMID: 16769731
17. Balemi T, Negisho K. Management of soil phosphorus and plant adaptation mechanisms to phosphorus stress for sustainable crop production: a review. *Journal of Soil Science and Plant Nutrition*. 2012; 12(3): 547–562. <http://doi.org/10.4067/S0718-95162012005000015>
18. Tarafdar JC, Claassen N. Comparative efficiency of acid phosphatase originated from plant and fungal sources. *Journal of Plant Nutrition and Soil Science*. 2001; 164(3): 279–282. [https://doi.org/10.1002/1522-2624\(200106\)164:3%3C279::AID-JPLN279%3E3.0.CO;2-L](https://doi.org/10.1002/1522-2624(200106)164:3%3C279::AID-JPLN279%3E3.0.CO;2-L)
19. Richardson AE, Lynch JP, Ryan PR, Delhaize E, Smith FA, Smith SE, et al. Plant and microbial strategies to improve the phosphorus efficiency of agriculture. *Plant and Soil*. 2011; 349: 121–156. <https://doi.org/10.1007/s11104-011-0950-4>
20. Wei K, Chen Z, Jiang N, Zhang Y, Feng J, Tian J, et al. Effects of mineral phosphorus fertilizer reduction and maize straw incorporation on soil phosphorus availability, acid phosphatase activity, and maize grain yield in northeast China. *Archives of Agronomy and Soil Science*. 2020; 67(1): 66–78. <http://doi.org/10.1080/03650340.2020.1714031>
21. Teixeira FF, Avellar G. Considerações sobre a manutenção de germoplasma de milho no Brasil. 1st ed. Embrapa: Milho e Sorgo. 2008. Available from: [https://ainfo.cnptia.embrapa.br/digital/bitstream/CNPMS-2009-09/21392/1/Doc\\_70.pdf](https://ainfo.cnptia.embrapa.br/digital/bitstream/CNPMS-2009-09/21392/1/Doc_70.pdf)
22. Dhillon J, Torres G, Driver E, Figueiredo B, Raun WR. World phosphorus use efficiency in cereal crops. *Agronomy Journal*. 2017; 109(4): 1670–1677. <http://doi.org/10.2134/agronj2016.08.0483>
23. Tran HT, Hurley BA, Plaxton WC. Feeding hungry plants: the role of purple acid phosphatases in phosphate nutrition. *Plant Science*. 2010; 179(1–2): 14–27. <http://doi.org/10.1016/j.plantsci.2010.04.005>
24. González-Muñoz E, Avendano-Vazquez AO, Montes RA, Folter S, Andres-Hernandez L, Abreu-Goodger C, et al. The maize (*Zea mays* ssp. *mays* var. B73) genome encodes 33 members of the purple acid phosphatase family. *Frontiers in Plant Science*. 2015; 6: 341. <https://doi.org/10.3389/fpls.2015.00341> PMID: 26042133
25. Wang L, Hou B, Zhang D, Lyu Y, Zhang K, Li H, et al. The niche complementarity driven by rhizosphere interactions enhances phosphorus-use efficiency in maize/alfalfa mixture. *Food and Energy Security*. 2020; 9(4): e252. <https://doi.org/10.1002/fes3.252>
26. Sun B, Gao Y, Wu X, Ma H, Zheng C, Wang X, et al. The relative contributions of pH, organic anions, and phosphatase to rhizosphere soil phosphorus mobilization and crop phosphorus uptake in maize/alfalfa polyculture. *Plant and Soil*. 2019; 447: 117–133. <https://doi.org/10.1007/s11104-019-04110-0>
27. Santos HG, Jacomine PKT, Anjos LHC, Oliveira VA, Lumbriera JF, Coelho MR, et al. Sistema brasileiro de classificação de solos. 5th ed. Embrapa. 2018. Available from: <https://ainfo.cnptia.embrapa.br/digital/bitstream/item/199517/1/SiBCS-2018-ISBN-9788570358004.pdf>
28. ovais RF, Ferreira PR, Neves JCL, Barros NF. Absorção de fósforo e crescimento do milho com sistema radicular parcialmente exposto a fonte de fósforo. *Pesquisa Agropecuária Brasileira*. 1985; 20(7): 749–754.

29. Olde Venterink H. Legumes have a higher root phosphatase activity than other forbs, particularly under low inorganic P and N supply. *Plant and Soil*. 2011; 347: 137–146. <https://doi.org/10.1007/s11104-011-0834-7>
30. Raij B, Andrade JC, Cantarella H, Quaggio JA. *Análise química para avaliação da fertilidade de solos tropicais*. 1st ed. Instituto Agronômico. 2001. [https://www.iac.sp.gov.br/publicacoes/arquivos/Raij\\_et\\_al\\_2001\\_Metod\\_Anal\\_IAC.pdf](https://www.iac.sp.gov.br/publicacoes/arquivos/Raij_et_al_2001_Metod_Anal_IAC.pdf)
31. Lannes LS, Olde Venterink H, Leite MR, Silva JN, Oberhofer M. Boron application increases growth of Brazilian Cerrado grasses. *Ecology and Evolution*. 2020; 10(13): 6364–6372. <https://doi.org/10.1002/ece3.6367> PMID: 32724518
32. Teixeira DS, Rezende AA, Lannes LS. Response of vegetation to sheep dung addition in a degraded Cerrado area. *Revista Brasileira de Engenharia Agrícola e Ambiental*. 2019; 23: 47–52. <https://doi.org/10.1590/1807-1929/agriambi.v23n1p47-52>
33. Köppen W. Klassifikation der klimate nach temperatur, niederschlag und jahreslauf. *Petermanns Mitt*. 1918; 64: 193–203.
34. Almeida IPC, Silva PSL, Negreiros MZ, Barbosa Z. Baby corn, green ear, and grain yield of corn cultivars. *Horticultura Brasileira*. 2005; 23(4): 960–964. <https://doi.org/10.1590/S0102-05362005000400020>
35. Fidelis RR, Miranda GV, Erasmo EAL. Seleção de populações base de milho sob alta e baixa dose de fósforo em solo de cerrado. *Pesquisa. Agropecuária Tropical*. 2009; 39(4): 285–293. <https://www.revistas.ufg.br/pat/article/view/3496/5826>
36. Silva PSL, Silva KMB, Silva PIB, Oliveira VR, Ferreira JLB. Green ear yield and grain yield of maize cultivars in competition with weeds. *Planta Daninha*. 2010; 28(1). <https://doi.org/10.1590/S0100-83582010000100010>
37. Mendes SM, Boregas KGB, Lopes ME, Waquil MS, Waquil JM. Fall armyworm responses to genetically modified maize expressing the toxin Cry 1A(b). *Pesquisa Agropecuária Brasileira*. 2011; 46(3). <https://doi.org/10.1590/S0100-204X2011000300003>
38. Costa CTS, Teodoro I, Silva S, Cunha FN, Teixeira MB, Soares FAL, Morais WA, et al. Agronomic performance, production components and agricultural productivity of maize (*Zea mays* L.) cultivars. *African Journal of Agricultural Research*. 2016; 11(43): 4375–4383. <https://doi.org/10.5897/AJAR2016.11587>
39. Galindo FS, Teixeira Filho MCM, Buzetti S, Rodrigues WL, Fernandes GC, Boleta EHM, et al. Nitrogen rates associated with the inoculation of *Azospirillum brasilense* and application of Si: Effects on micro-nutrients and silicon concentration in irrigated corn. *Journal Open Agriculture*. 2018; 3(1): 510–523. <https://doi.org/10.1515/opag-2018-0056>
40. Mijone AP, Nogueira APO, Hamawaki OT, Maes ML, Pinsetta Junior JS. Adaptability and stability of corn hybrids in the off season across various agricultural regions in Brazil. *Genetics and Molecular Research*. 2019; 18(3): gmr18193. <https://doi.org/10.4238/gmr18193>
41. Pereira NCM, Galindo FS, Gazola RPD, Dupas E, Rosa PAL, Mortinho ES, et al. Corn yield and phosphorus use efficiency response to phosphorus rates associated with plant growth promoting bacteria. *Frontiers in Environmental Science*. 2020; 8: 40. <https://doi.org/10.3389/fenvs.2020.00040>
42. Queiroz P, Alves Filho I, Pereira Junior S, van Cleef FS, Ezequiel J, Kaneko F, et al. PSIX-10 in vitro dry matter digestibility, gas production and pH of silages of several maize hybrids. *Journal of Animal Science*. 2020; 98(4): 415–416. <https://doi.org/10.1093/jas/skaa278.725>
43. Pereira CS, Zanetti VH, Schoffen ME, Wiest G, Fiorini IVA. Characters of production and ClorofiloG@index of thirteen maize hybrids in northern Mato Grosso. *Agrarian*. 2021; 14(52): 233–240. <https://doi.org/10.30612/agrarian.v14i52.10333>
44. Faria RD, Fanela TLM, Sartori MMP, Lopes JRS, Lourenção AL, Baldin ELL. Evaluation of resistance of *BT* and non-*BT* maize genotypes to *Dalbulus maidis* (Hemiptera: Cicadellidae) and associated molluscites. *Phytoparasitica*. 2022. <https://doi.org/10.1007/s12600-022-00999-z>
45. Cohen J. *Statistical power analysis for the behavioral sciences*. Hilldale: Lawrence Earlbaum Associates. 1988.
46. Plénet D, Mollier A, Pellerin S. Growth analysis of maize field crops under phosphorus deficiency. II. Radiation-use efficiency, biomass accumulation and yield components. *Plant and Soil*. 2000; 224: 259–272. <http://doi.org/10.1023/A:1004835621371>
47. Olde Venterink H, Gusewell S. Competitive interactions between two meadow grasses under nitrogen and phosphorus limitation. *Functional Ecology*. 2010; 24(4): 877–886. <http://doi.org/10.1111/j.1365-2435.2010.01692.x>
48. Gaume A, Mächler F, De León C, Narro L, Frossard E. Low-P tolerance by maize (*Zea mays* L.) genotypes: Significance of root growth, and organic acids and acid phosphatase root exudation. *Plant and Soil*. 2001; 228: 253–264. <http://doi.org/10.1023/A:1004824019289>

49. Marklein AR and Houlton BZ. Nitrogen inputs accelerate phosphorus cycling rates across a wide variety of terrestrial ecosystems. *New Phytologist*. 2012; 193(3): 696–704. <https://doi.org/10.1111/j.1469-8137.2011.03967.x> PMID: 22122515
50. Margalef O, Sardans J, Fernández-Martínez M, Molowny-Horas R, Janssens IA, Ciais P, et al. Global patterns of phosphatase activity in natural soils. *Scientific Reports*. 2017; 7: 1337. <https://doi.org/10.1038/s41598-017-01418-8> PMID: 28465504
51. Margalef O, Sardans J, Maspons J, Molowny-Horas R, Fernández-Martínez M, Janssens IA, et al. The effect of global change on soil phosphatase activity. *Global Change Biology*. 2021; 27(22): 5989–6003. <https://doi.org/10.1111/gcb.15832> PMID: 34383341
52. Lannes LS, Karrer S, Teodoro DAA, Bustamante MMC, Edwards PJ, Olde Venterink H. Species richness both impedes and promotes alien plant invasions in the Brazilian Cerrado. *Scientific Reports*. 2020; 10: 11365. <https://doi.org/10.1038/s41598-020-68412-5> PMID: 32647221
53. Chen X, Chen HYH, Chang SX. Meta-analysis shows that plant mixtures increase soil phosphorus availability and plant productivity in diverse ecosystems. *Nature Ecology & Evolution*. 2022; 6: 1112–1121. <https://doi.org/10.1038/s41559-022-01794-z> PMID: 35760890
54. Lu L, Qiu W, Gao W, Tyerman SD, Shou H, Wang C. *OsPAP10c*, a novel secreted acid phosphatase in rice, plays an important role in the utilization of external organic phosphorus. *Plant Cell and Environment*. 2016; 39(10): 2247–2259. <http://doi.org/10.1111/pce.12794>
55. Wang X, Wang Y, Tian J, Lim BL, Yan X, Liao H. Overexpressing *AtPAP15* enhances phosphorus efficiency in soybean. *Plant Physiology*. 2009; 151(1): 233–240. <http://doi.org/10.1104/pp.109.138891>
56. Van Deynze A, Zamora P, Delaux P-M, Heitmann C, Jayaraman D.; Rajasekar S, et al. Nitrogen fixation in a landrace of maize is supported by a mucilage-associated diazotrophic microbiota. *PLoS Biology*. 2018; 16(8): e2006352. <https://doi.org/10.1371/journal.pbio.2006352> PMID: 30086128
57. Machado CTT, Furlani ÂMC. Root phosphatase activity, plant growth and phosphorus accumulation of maize genotypes. *Scientia Agricola*. 2004; 61(2): 216–223. <https://doi.org/10.1590/S0103-90162004000200015>
58. Chen J, Xu L, Cai Y, Xu J. QTL mapping of phosphorus efficiency and relative biologic characteristics in maize (*Zea mays* L.) at two sites. *Plant and Soil*. 2008; 313: 251–266. <http://doi.org/10.1007/s11104-008-9698-x>
59. Penuelas J, Janssens I, Ciais P, Obersteiner M, Sardans J. Anthropogenic global shifts in biospheric N and P concentrations and ratios and their impacts on biodiversity, ecosystem productivity, food security, and human health. *Global Change Biology*. 2020; 26(4): 1962–1985. <https://doi.org/10.1111/gcb.14981> PMID: 31912629
